# Supplementary material for: Exploring the Neandertal legacy of pancreatic ductal adenocarcinoma risk in Eurasians
Source: PubMed Central journal article supplement (PMC10424372; doi:10.1186/s40659-023-00457-y), 2023-08-13
Supplement: 40659_2023_457_MOESM1_ESM.pdf [file 40659_2023_457_MOESM1_ESM.pdf]

**Additional File 1. Independent associations (P<0.05) identified in PanScan+PanC4 association studies.**

Independent ( $r^2>0.5$ ) aSNPs showing an association  $P<0.05$  in PanScan, PanC4, and combined datasets. The displayed summary statistics resulted from the analysis with the combined datasets. aSNPs are arranged in increasing order of P-value. (*Abbreviations:* aSNP, Neandertal introgressed Single Nucleotide Polymorphism; m, minor allele; M, major allele, MAF, minor allele frequency).

| aSNP        | position    | M/m | OR (95%C.I.)     | P        | MAF  | aSNPs in LD with SNP in first column                                                                                                                                                         |
|-------------|-------------|-----|------------------|----------|------|----------------------------------------------------------------------------------------------------------------------------------------------------------------------------------------------|
| rs12998719  | 2:67583252  | G/A | 1.11 (1.05-1.16) | 5.51E-05 | 0.29 | -                                                                                                                                                                                            |
| rs61966285  | 13:73754491 | A/G | 1.2 (1.1-1.31)   | 6.92E-05 | 0.07 | rs75374843; rs61966283; rs61966270; rs61966272; rs61966278; rs61966276; rs61966275; rs61966315; rs61967426; rs61967427; rs61967420                                                           |
| rs72637203  | 1:163826043 | T/C | 0.81 (0.72-0.9)  | 1.49E-04 | 0.04 | -                                                                                                                                                                                            |
| rs11621061  | 14:73993369 | C/T | 0.9 (0.85-0.95)  | 1.75E-04 | 0.22 | rs61987098; rs112943342; rs55746412; rs61987093; rs61987092; rs61988864; rs7159760; rs62004868; rs145538420; rs8008784; rs7158675; rs56175115; rs61988862; rs7157889; rs61988863; rs17182412 |
| rs75150422  | 13:63320439 | T/C | 0.66 (0.53-0.82) | 2.29E-04 | 0.01 | rs78065501; rs148797436; rs76176688; rs149174916                                                                                                                                             |
| rs117985418 | 20:17476761 | G/A | 0.73 (0.61-0.86) | 2.30E-04 | 0.02 | rs78925871; rs74488569; rs139487395                                                                                                                                                          |
| rs78759798  | 1:61844428  | C/T | 1.16 (1.07-1.26) | 2.43E-04 | 0.09 | rs77394732; rs17356741; rs114939720; rs17265629                                                                                                                                              |
| rs78390364  | 5:53951839  | G/A | 0.8 (0.71-0.9)   | 2.53E-04 | 0.04 | rs185489626; rs150512284; rs80170612                                                                                                                                                         |
| rs12897922  | 14:43001228 | C/A | 1.2 (1.09-1.33)  | 2.94E-04 | 0.05 | rs12877994; rs12878899; rs12896511; rs66491209; rs35631271; rs35210813; rs12891764; rs35133792; rs35646082; rs12893585; rs34157262; rs34221614; rs67108906; rs72676360; rs17112972           |
| rs75342815  | 15:39187846 | A/C | 1.32 (1.13-1.53) | 2.98E-04 | 0.02 | -                                                                                                                                                                                            |
| rs76264672  | 9:110909694 | C/T | 0.83 (0.75-0.92) | 3.96E-04 | 0.05 | rs117199844; rs116943216; rs10979225; rs78645898; rs12340710; rs77712704; rs78879621; rs12343590; rs75119583; rs12342378; rs77543845; rs12338325; rs79661666; rs77528613; rs116915917        |
| rs77139395  | 3:191445560 | C/T | 1.17 (1.07-1.29) | 5.24E-04 | 0.07 | rs77199312; rs75047958                                                                                                                                                                       |
| rs147979801 | 7:41387183  | T/A | 0.85 (0.78-0.93) | 5.36E-04 | 0.06 | rs116903293; rs78315069; rs11767732; rs55988998; rs117626946; rs77454616; rs17624981                                                                                                         |
| rs113831293 | 6:1080941   | T/C | 0.85 (0.78-0.93) | 5.84E-04 | 0.06 | -                                                                                                                                                                                            |
| rs80218418  | 1:39191712  | C/G | 0.82 (0.73-0.92) | 6.22E-04 | 0.04 | rs149925270                                                                                                                                                                                  |
| rs74890892  | 9:103994550 | A/G | 0.77 (0.67-0.9)  | 6.48E-04 | 0.02 | rs117857762; rs117938445; rs117523034; rs74988536; rs74570992; rs79025031; rs76677606                                                                                                        |

*Continues in the next page*

| aSNP        | position     | M/m | OR (95%C.I.)     | P        | MAF  | aSNPs in LD with SNP in first column                                                                                                                                                                                                                               |
|-------------|--------------|-----|------------------|----------|------|--------------------------------------------------------------------------------------------------------------------------------------------------------------------------------------------------------------------------------------------------------------------|
| rs4649395   | 1:232763275  | G/T | 1.48 (1.18-1.85) | 7.14E-04 | 0.01 | -                                                                                                                                                                                                                                                                  |
| rs55955026  | 7:129441957  | T/A | 0.87 (0.81-0.94) | 7.67E-04 | 0.09 | -                                                                                                                                                                                                                                                                  |
| rs17759656  | 6:130405923  | C/T | 1.14 (1.05-1.23) | 9.04E-04 | 0.10 | rs13204752; rs34552886; rs62421345; rs62421346; rs13196495; rs17816084; rs17705246; rs1932103; rs10485401                                                                                                                                                          |
| rs17515149  | 8:16853661   | C/T | 1.15 (1.06-1.25) | 9.11E-04 | 0.08 | -                                                                                                                                                                                                                                                                  |
| rs4804790   | 19:7797154   | G/T | 1.16 (1.06-1.26) | 9.15E-04 | 0.07 | rs117034642; rs4804798; rs76560987; rs117133715; rs4804799                                                                                                                                                                                                         |
| rs13209147  | 6:33792499   | G/A | 0.91 (0.86-0.96) | 9.51E-04 | 0.21 | -                                                                                                                                                                                                                                                                  |
| rs62168909  | 2:163761091  | G/A | 1.17 (1.07-1.28) | 9.91E-04 | 0.06 | rs62168910; rs1972672                                                                                                                                                                                                                                              |
| rs2858635   | 22:49646062  | T/C | 0.89 (0.82-0.95) | 1.01E-03 | 0.11 | rs2688139; rs2858634; rs2688140; rs2688134; rs2858640; rs2688133; rs2858637; rs2858639; rs2688136; rs2688135; rs2001074                                                                                                                                            |
| rs76078234  | 6:1370689    | G/C | 1.15 (1.06-1.24) | 1.02E-03 | 0.09 | rs77160910; rs75294181; rs78915578                                                                                                                                                                                                                                 |
| rs78051589  | 8:9216948    | C/G | 1.13 (1.05-1.22) | 1.15E-03 | 0.11 | rs76155946; rs12155604                                                                                                                                                                                                                                             |
| rs7264182   | 20:3691738   | T/A | 1.18 (1.07-1.3)  | 1.29E-03 | 0.06 | -                                                                                                                                                                                                                                                                  |
| rs140855472 | 14:94454139  | A/T | 1.25 (1.09-1.43) | 1.35E-03 | 0.03 | -                                                                                                                                                                                                                                                                  |
| rs75720706  | 1:98006414   | A/T | 0.75 (0.63-0.9)  | 1.40E-03 | 0.02 | -                                                                                                                                                                                                                                                                  |
| rs1596274   | 2:185283979  | T/C | 0.9 (0.85-0.96)  | 1.43E-03 | 0.15 | rs35943449                                                                                                                                                                                                                                                         |
| rs78724593  | 10:123561253 | G/C | 0.79 (0.68-0.91) | 1.44E-03 | 0.02 | -                                                                                                                                                                                                                                                                  |
| rs62364586  | 5:93720171   | T/C | 1.3 (1.1-1.52)   | 1.68E-03 | 0.02 | -                                                                                                                                                                                                                                                                  |
| rs71407346  | 15:91454837  | C/T | 1.14 (1.05-1.24) | 1.69E-03 | 0.08 | rs71407347                                                                                                                                                                                                                                                         |
| rs41457849  | 1:61831219   | T/C | 1.17 (1.06-1.29) | 1.82E-03 | 0.06 | -                                                                                                                                                                                                                                                                  |
| rs117255495 | 14:55268294  | T/C | 0.84 (0.75-0.94) | 1.83E-03 | 0.04 | -                                                                                                                                                                                                                                                                  |
| rs2071240   | 5:149755744  | G/C | 0.87 (0.8-0.95)  | 1.91E-03 | 0.07 | rs148432105; rs78451313; rs75194147; rs74555574; rs7728652; rs79012265; rs2295223; rs115781303; rs80008426; rs79083653; rs79972705                                                                                                                                 |
| rs17064844  | 8:2123865    | G/C | 0.9 (0.84-0.96)  | 1.97E-03 | 0.13 | -                                                                                                                                                                                                                                                                  |
| rs187763209 | 11:33108014  | G/A | 0.75 (0.62-0.9)  | 2.09E-03 | 0.01 | rs139071483; rs190807245; rs140779429; rs188476796; rs145819397; rs138727904; rs138163012; rs145706990; rs150487468; rs188505360; rs150201139; rs182531058; rs144216729; rs189433203; rs142250164; rs180831300; rs147374678; rs183359932; rs143626152; rs186219082 |

Continues in the next page

| aSNP        | position     | M/m | OR (95%C.I.)     | P        | MAF  | aSNPs in LD with SNP in first column                                                                                                                                                                                                                                                                                                                    |
|-------------|--------------|-----|------------------|----------|------|---------------------------------------------------------------------------------------------------------------------------------------------------------------------------------------------------------------------------------------------------------------------------------------------------------------------------------------------------------|
| rs79420240  | 1:216112462  | C/G | 0.81 (0.71-0.93) | 2.16E-03 | 0.03 | rs79835717                                                                                                                                                                                                                                                                                                                                              |
| rs114957082 | 6:1338570    | G/A | 1.11 (1.04-1.18) | 2.62E-03 | 0.14 | rs77510766; rs79616889; rs6934726;<br>rs6939790; rs74447631; rs17261011;<br>rs77926136; rs80181719; rs74484590;<br>rs75289435; rs79565252; rs17260983;<br>rs79842006; rs74622239; rs79368490;<br>rs77796590; rs75802256; rs4959546;<br>rs75586483; rs79783857; rs78451852;<br>rs75472582; rs78252540; rs79618067;<br>rs17261109; rs17261060; rs17201698 |
| rs2088895   | 5:4728211    | C/G | 0.86 (0.78-0.95) | 2.69E-03 | 0.05 | -                                                                                                                                                                                                                                                                                                                                                       |
| rs112667742 | 2:157111093  | G/C | 1.15 (1.05-1.26) | 2.74E-03 | 0.06 | rs72892105; rs72892108; rs4369815;<br>rs55723553; rs112576099; rs56273981;<br>rs72892147; rs111506532; rs72902194;<br>rs17248011; rs56004078; rs17188189;<br>rs72904295; rs17188483; rs72909904;<br>rs72909905; rs13410664; rs72906131;<br>rs72909979; rs72906107; rs72906116;<br>rs72907892; rs17188434; rs112939153;<br>rs72906111; rs72902199        |
| rs72729713  | 5:8063953    | C/A | 0.84 (0.74-0.94) | 2.76E-03 | 0.04 | -                                                                                                                                                                                                                                                                                                                                                       |
| rs4285939   | 12:119560691 | G/T | 0.82 (0.71-0.93) | 3.18E-03 | 0.03 | -                                                                                                                                                                                                                                                                                                                                                       |
| rs67388748  | 3:126954373  | G/A | 1.12 (1.04-1.21) | 4.12E-03 | 0.10 | rs68061258                                                                                                                                                                                                                                                                                                                                              |
| rs11060965  | 12:131002001 | C/T | 1.13 (1.04-1.23) | 4.16E-03 | 0.08 | -                                                                                                                                                                                                                                                                                                                                                       |
| rs75804723  | 5:55983757   | C/T | 0.86 (0.77-0.95) | 4.79E-03 | 0.05 | rs75386672                                                                                                                                                                                                                                                                                                                                              |
| rs72939407  | 18:60739269  | C/G | 1.14 (1.04-1.25) | 4.93E-03 | 0.07 | rs72939409; rs72935517                                                                                                                                                                                                                                                                                                                                  |
| rs9893191   | 17:6346738   | A/G | 0.9 (0.83-0.97)  | 5.21E-03 | 0.09 | rs4796495                                                                                                                                                                                                                                                                                                                                               |
| rs138899456 | 12:63294090  | C/T | 0.77 (0.63-0.93) | 5.90E-03 | 0.01 | -                                                                                                                                                                                                                                                                                                                                                       |
| rs2700907   | 7:36189847   | T/C | 0.93 (0.89-0.98) | 7.88E-03 | 0.26 | -                                                                                                                                                                                                                                                                                                                                                       |
